# Supplementary material
Source: Springer Nature journal article supplement (https://www.springermedizin.de/resource/supplementary/13012_2011_441_MOESM3_ESM.pdf/9630126)

- Demographics
- Letters
- Identity Manager
- EDR
- PACS
- SignOut DIC
- ONBASE
- MAKIMAGING
- MUSE
- NS PACS
- Synopsis
- eMedRec
- Forms
- Immunizations
- Patient Education
- Medications
- Order Entry
- Visit Navigator
- Doc Flowsheets**
- More Activities ▶

## Doc Flowsheets

? Resize

File | Add Row | Add Group | Add LDA | Cascade | Add Col | Insert Col | Device | Compact | Last Filed | Graph | Details | More

Flowsheet:

|                                        |                                     |                                     |                                      |        |                                                               |
|----------------------------------------|-------------------------------------|-------------------------------------|--------------------------------------|--------|---------------------------------------------------------------|
| ADAPT Study                            | <input type="checkbox"/>            |                                     |                                      | 4/7/10 |                                                               |
| Reduce Sweetened drinks/day (j...      | <input checked="" type="checkbox"/> |                                     |                                      | 0800   |                                                               |
| Meals at home                          | <input type="checkbox"/>            |                                     |                                      |        | Reduce Sweetened drinks/day (juice, soda, snapple, vit water) |
| Eating out (Fast food, take out, di... | <input type="checkbox"/>            | <input checked="" type="checkbox"/> | Sweetened Drinks/day - CURRENT       |        |                                                               |
| Portion Control                        | <input type="checkbox"/>            |                                     |                                      |        | Exercise Barriers                                             |
| Reduce Alcoholic Beverages             | <input type="checkbox"/>            | <input checked="" type="checkbox"/> | Activity Level (Steps/day) - CURRENT |        |                                                               |
| Other                                  | <input type="checkbox"/>            |                                     |                                      |        |                                                               |
| Exercise Barriers                      | <input checked="" type="checkbox"/> |                                     |                                      |        |                                                               |

| Value | Comment | Time Taken | Time Recd | User Taken | User Recd | Show Audit |
|-------|---------|------------|-----------|------------|-----------|------------|
|       |         |            |           |            |           |            |

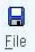

Supplement: MOESM3 [file 9630126]
